23 #Address correspondence to Hongwei Zhou, [biodegradation@gmail.com](mailto:biodegradation@gmail.com) and Zhang

24 Wang, [wangz@m.scnu.edu.cn](mailto:wangz@m.scnu.edu.cn).

25

26 Running title: COPD airway bacterial-fungal microbiota

27

28 Abbreviation List: AUC: Area under the curve; COPD: Chronic obstructive  
29 pulmonary disease; ENA: European Nucleotide Archive; FDR: False discovery rate;  
30 FEV1: Forced expiratory volume in 1 s; FVC: Forced vital capacity; GOLD: Global  
31 Initiative for Chronic Obstructive Lung Disease; LDA: Linear discriminant analysis;  
32 LEfSe: Linear discriminant analysis effect size; IL: Interleukin; INF- $\gamma$ : Interferon- $\gamma$ ;  
33 OTUs: Operational taxonomic units; PBS: phosphate-buffered saline; PCoA:  
34 Principal Coordinate Analysis; QIIME: Quantitative Insights into Microbial Ecology;  
35 sRAGE: Soluble receptor for advanced glycation endproducts; TGF- $\beta$ : Transforming  
36 growth factor- $\beta$ ; TNF- $\alpha$ : Tumor necrosis factor  $\alpha$ ; VEGF: Vascular endothelial growth  
37 factor.

38

39

40 **Abstract**

41 **Background:** Little is known about airway mycobiome, and its relationship with  
42 bacterial microbiome in chronic obstructive pulmonary disease (COPD).

43

44 **Methods:** Here we report the first simultaneous characterization of sputum bacterial  
45 and fungal microbiome in 84 stable COPD and 29 healthy subjects, using 16S  
46 ribosomal DNA and fungal internal transcribed spacer DNA sequencing.

47

48 **Results:** Ascomycota predominated over Basidiomycota in fungal microbiome both  
49 in COPD patients and healthy controls. *Meyerozyma*, *Candida*, *Aspergillus* and  
50 *Schizophyllum* were most abundant at the genus level. There was a significant inverse  
51 correlation between bacterial and fungal microbial diversity, both of which altered in  
52 opposite directions in COPD patients versus controls, and in frequent versus  
53 non-frequent exacerbators. An enhanced bacterial-fungal ecological interaction was  
54 observed in COPD patients, which was characterized by higher proportion of  
55 co-occurrence intrakingdom interactions and co-exclusive interkingdom interactions.  
56 In COPD, four mutually co-occurring fungal operational taxonomic units (OTUs) in  
57 *Candida palmioleophila*, *Aspergillus* and Sordariomycetes exhibited co-exclusive  
58 relationships with other fungal OTUs, which was specifically present in frequent  
59 exacerbators but not in non-frequent exacerbators. Conversely, the mutual  
60 co-occurrence interactions between bacterial OTUs in *Rothia mucilaginosa*,  
61 *Streptococcus*, *Veillonella* and *Prevotella*, showed up in non-frequent exacerbators

62 but not in frequent exacerbators. The perturbed bacterial-fungal interactions in COPD

63 were associated with increased airway inflammatory mediators such as IL-6 and IL-8.

64

65 **Interpretation:** The disruption of airway bacterial-fungal community balance,

66 characterized by the loss of commensal bacterial taxa and enriched pathogenic fungal

67 taxa, is implicated in COPD. The airway mycobiome is an important cofactor

68 mediating COPD pathogenic infection and host inflammation.

69

70 **Clinical Trial Registration:** [www.clinicaltrials.gov](http://www.clinicaltrials.gov) (NCT 03240315).

71

72 **Keywords:** COPD, frequent exacerbator, airway microbiome, mycobiome,

73 bacterial-fungal interactions

74 **Introduction**

75 Chronic obstructive pulmonary disease (COPD) is characterized by chronic airway  
76 inflammation resulting in irreversible decline in respiratory function and capacity.  
77 Bacterial, fungal and viral infections drive airway inflammation, and are associated  
78 with poorer disease outcome(1) and declined lung function(2, 3). The airway  
79 microbiome, the collective airway microbial community, is hypothesized to mediate  
80 the interactions between pathogenic infection and host inflammatory response(4, 5).  
81 Through interacting with bacteria and mucosal immune system(6), the fungal  
82 community can be a cofactor for airway inflammation and COPD progression(7).  
83 Essentially all previous airway microbiome studies, however, have focused on  
84 bacterial community in COPD(4, 8-14). The non-bacterial members of airway  
85 microbiome in particular the fungal microbiome (or mycobiome), despite being of  
86 clinical relevance, have been largely underappreciated(7). Recent studies have  
87 reported the airway fungal composition in asthma(15), bronchiectasis(16), cystic  
88 fibrosis(17, 18), HIV(19) and lung transplantation(20); however, little is known on the  
89 mycobiome in COPD. The ecological interaction between airway bacterial and fungal  
90 microbiome and its role in COPD pathogenesis remains unexplored.

91

92 Susceptibility to frequent exacerbations represents an independent clinical phenotype  
93 in COPD, the ‘frequent exacerbator’ phenotype, and is associated with poorer clinical  
94 outcome(21, 22). The Global Initiative for Chronic Obstructive Lung Disease (GOLD)  
95 2019 has redefined the measure of disease severity to recognized the high

96 exacerbation risk(23) ( $\geq 2$  exacerbations and /or 1 hospitalization in the previous  
97 year). The pathophysiology underlying the frequent exacerbation phenotype is  
98 manifested by an interplay between enhanced airway immune responses, bacterial and  
99 fungal colonization and dynamic lung hyperinflation, that together predispose patients  
100 to persistent inflammation and recurrent exacerbations(22). Identifying markers that  
101 predict patient exacerbation frequency is of great importance for COPD management.  
102 Difference in baseline respiratory microbiome composition was hypothesized to  
103 explain the different exacerbation frequency in COPD patients(21). However, studies  
104 assessing baseline airway microbiome have not found significant differences in  
105 bacterial composition between frequent and non-frequent exacerbators(4, 14). Recent  
106 longitudinal studies suggested that temporal variability of the sputum microbiome  
107 could be associated with COPD exacerbation frequency(14, 24). However, measuring  
108 microbial temporal variability requires serial sampling of sputum microbiome in  
109 multiple timepoints and is therefore not clinically practical. Assessing the airway  
110 fungal microbiome might open up opportunities in identifying novel markers for the  
111 frequent exacerbator phenotype.

112

113 Here we characterized the airway bacterial and fungal microbiome simultaneously in  
114 clinically stable COPD patients. We hypothesize that the ecological interactions  
115 between bacterial, fungal microbiome and host inflammation are associated with  
116 disease and exacerbation frequency. We showed that bacterial and fungal microbiome  
117 co-altered in COPD. The perturbation of bacterial-fungal interactions in COPD was

118 associated with host inflammation and the frequent exacerbator phenotype.

## 119 **Materials and Methods**

### 120 **Subjects and samples**

121 Sputum samples of 113 individuals, including 84 stable COPD patients and 29  
122 healthy controls, were collected in the First Affiliated Hospital of Guangzhou Medical  
123 University. COPD patients were divided into frequent (FE: exacerbation events  $\geq 2$   
124 or 1 hospitalization due to exacerbation of COPD/past year) and non-frequent  
125 exacerbators (NE). The study was approved by the ethics committee of the First  
126 Affiliated Hospital of Guangzhou Medical University and was registered in  
127 [www.clinicaltrials.gov](http://www.clinicaltrials.gov) (NCT 03240315). All subjects provided written informed  
128 consent in accordance with the Declaration of Helsinki.

129

### 130 **Bacterial and fungal microbiome sequencing**

131 Bacterial genomic DNA was extracted from selected sputum plugs using a Total  
132 Nucleic Acid Extraction Kit (Bioeasy Technology, Inc., Shenzhen, China) as per the  
133 manufacturer's instructions. Negative controls for extraction (no sputum) and PCR  
134 amplification (no DNA template, ddH<sub>2</sub>O only) were included in each experiment. The  
135 extraction negative controls were subsequently sequenced to identify any potential  
136 contaminating bacterial/fungal species. The V4 hypervariable region of bacterial 16S  
137 rRNA gene and fungal 18S–28S rRNA gene internally transcribed spacer region ITS1  
138 DNA were amplified using barcoded primers, and were sequenced using iTorrent  
139 sequencing platform.



140

## 141 **Sequence processing and analysis**

142 Sequence processing and analysis were performed using QIIME 1.9.1(25). The  
143 obtained sequences were de-multiplexed, trimmed of barcodes and primers, and  
144 filtered if they contained ambiguous bases or mismatches in the primer regions,  
145 according to the BIPES protocol(26). Chimeras were filtered out using UCHIME in  
146 *de novo* mode(27). After quality filtering and chimera removal, 16S rRNA gene  
147 sequencing resulted in a median read depth of 4,380, ITS1 DNA sequencing resulted  
148 in a median read depth of 9,783. Both 16S rRNA V4 region and ITS1 DNA  
149 sequencing data of all subjects were subsampled to a uniform depth of 1,000 reads  
150 based on rarefaction curve asymptotes and Good's coverage values. Comparable  
151 rarefaction depth has been used in airway microbiome analyses(4, 28).

152

153 High-quality sequence reads for bacterial 16S rRNA V4 and fungal ITS1 region were  
154 clustered into operational taxonomic units (OTUs) using USEARCH v11(29) in *de*  
155 *novo* mode with 97% sequence similarity cutoff. The taxonomy of representative 16S  
156 rRNA gene sequences were determined using PyNAST with the Greengenes 13\_8  
157 database as reference(30). The taxonomy of representative ITS sequences were  
158 determined using the QIIME\_ITS database as reference (version information:  
159 `sh_qiime_release_s_28.06.2017`)(25). The taxonomy of highly abundant unclassified  
160 fungal OTUs was further determined using the phylotyping algorithm in MEGAN5  
161 (<http://ab.inf.uni-tuebingen.de/software/megan5/>)(31). Briefly, the OTU representative

162 sequence was BLASTn-searched (BLAST v2.5.0) against the non-redundant  
163 reference database and the last common taxonomic rank of all sequence hits with >97%  
164 was assigned to that OTU. OTUs with >0.5% average abundance were selected for  
165 downstream analysis. The sequences were deposited in the European Nucleotide  
166 Archive (ENA) under accession numbers PRJEB27507.

167

168 The biome data were filtered using the filter\_otus\_from\_otu\_table.py script with the  
169 parameter (-s 3) to remove low-abundance OTUs. Fifty-four OTUs (28 bacterial and  
170 16 fungal OTUs) were selected that were >0.5% average abundance for the major of  
171 OTU-based analysis. Airway microbial alpha diversity (diversity within samples) was  
172 calculated using the Shannon indices. Airway microbial beta diversity (composition  
173 dissimilarity between samples) was determined by using the unweighted UniFrac  
174 distance and visualized in Principal Coordinate Analysis (PCoA). Adonis was used to  
175 estimate statistical significance. Differential features between groups were identified  
176 using a linear discriminant analysis (LDA) effect size (LEfSe) method with a  
177 threshold of logarithmic LDA score 2.0(32). Random forest analysis was performed  
178 using the OTU data selected by LEfSe using Weka 3.8  
179 (<https://www.cs.waikato.ac.nz/ml/weka/>) with a 7-fold cross-validation(33).  
180 Co-occurrence and co-exclusion relationships between the 54 abundant bacterial and  
181 fungal OTUs were estimated using SparCC algorithm(34), known for its robustness to  
182 compositional effects in microbiome dataset. The p-value was estimated by 100  
183 bootstraps and the correlations with  $p < 0.05$  were retained. Association between

184 bacterial and fungal OTUs and inflammatory mediators was assessed using Spearman  
185 correlation. Network was visualized using Cytoscape 3.6.0  
186 (<https://cytoscape.org/>)(35). The false discovery rate (FDR)(36) method was used to  
187 adjust *P*-values for multiple testing wherever applicable.

188

## 189 **Results**

### 190 Overview of sputum bacterial and fungal microbiome

191 Sputum samples were collected from 84 stable COPD patients and 27 healthy controls  
192 (Table 1, Table S1). Consistent with previous studies(4, 8-11, 14, 24, 37), the majority  
193 of bacterial taxa belongs to Firmicutes (28.3%), Bacteroidetes (27.2%), Proteobacteria  
194 (24.6%), Actinobacteria (7.0%) and Fusobacteria (5.7%) at the phylum level. For the  
195 fungal microbiome, 76.6% sequences belong to Ascomycota (71.7%) or  
196 Basidiomycota (4.9%) and 17.7% sequences to unidentified fungi taxa. The most  
197 abundant fungal genera are *Meyerozyma*, *Candida*, *Aspergillus* and *Schizophyllum* (>1%  
198 average) (Fig. 1). There was a significant negative correlation between bacterial and  
199 fungal alpha diversity (Shannon, Spearman's  $\rho=-0.172$ ,  $p=0.04$ ). No significant  
200 association was found between bacterial or fungal microbiome with age, gender,  
201 smoking status and predicted FEV1% (Fig. 1).

202

### 203 Sputum bacterial and fungal microbiome in COPD patients and healthy controls

204 The bacterial composition shifted in COPD patients compared to healthy subjects,  
205 with a slight decrease in alpha diversity (Fig. 2a) and a significant decreased

206 abundance of genera *Streptococcus*, *Peptostrptococcus*, *Porphyromonas*, *Lautropia*  
207 and *Actinomyces* (Wilcoxon, FDR  $p < 0.05$ , Fig. 1). Conversely, the fungal diversity  
208 significantly increased in COPD (Fig. 2b), with a significant increased abundance in  
209 *Candida* and *Schizophyllum*, and three unclassified genera in Sordariomycetes,  
210 Saccharomycetales and Hypocreales (Wilcoxon, FDR  $p < 0.05$ , Fig. 1). Beta-diversity  
211 analysis indicated a better separation between healthy and COPD groups using fungal  
212 than bacterial composition (Adonis, bacteria:  $R^2 = 0.016$ ,  $p < 0.01$ ; fungi:  $R^2 = 0.061$ ,  
213  $p < 0.01$ , Fig. 2a-b). LEfSe analysis identified seven bacterial OTUs (bOTUs) and  
214 seven fungal OTUs (fOTUs) associated with disease state (LDA  $> 2.0$ , Fig. S1-2).  
215 Random forest analysis discriminated COPD patients from controls with an area  
216 under the curve (AUC) of 0.83, 0.91 and 0.97 using these bacterial, fungal and their  
217 combined OTUs, respectively (Fig. 2c). Sub-analysis using 52 age, gender and  
218 smoking-status matched subjects indicated that the observed microbiome differences  
219 were not related to these factors (Table S2, Fig. S3).

220

#### 221 Sputum bacterial and fungal microbiome in frequent and non-frequent exacerbators

222 COPD patients were divided into frequent (FE: exacerbation events  $\geq 2$  or 1  
223 hospitalization due to exacerbation of COPD/past year) and non-frequent exacerbators  
224 (NE). Patient demographic factors are overall comparable between the two groups  
225 except for a significantly higher FEV1% predicted in NE group (Table 1). Bacterial  
226 alpha diversity was significantly higher (Fig. 3a) in FE compared to NE group,  
227 whereas fungal alpha diversity showed the opposite trend (Fig. 3b). *Veillonella* was

228 significantly decreased in FE group (Wilcoxon, FDR  $p < 0.05$ , Fig. 1), whereas fungal  
229 genera *Candida* was significantly increased. Beta-diversity analysis also indicated a  
230 better separation between FE and NE for fungal compared to bacterial composition  
231 (Adonis, bacteria:  $R^2 = 0.019$ ,  $p < 0.01$ ; fungi:  $R^2 = 0.046$ ,  $p < 0.01$ , Fig. 3a-b). Seven  
232 bOTUs and seven fOTUs were associated with exacerbation frequency using LEfSe  
233 (LDA  $> 2.0$ , Fig. S4-5). Random forest analysis showed an AUC value of 0.78, 0.74  
234 and 0.81 in separating the two groups using these bacterial, fungal and their combined  
235 OTUs respectively (Fig. 3c).

236

### 237 Bacterial-fungal interactions in COPD patients and healthy controls

238 To explore ecological interactions between airway bacterial and fungal microbiome,  
239 we performed network analyses using 54 bacterial and fungal OTUs ( $> 0.5\%$  average  
240 relative abundance) using the SparCC algorithm(34). We observed considerable  
241 differences in bacterial-fungal interactions between COPD patients and controls. For  
242 COPD patients, 244 significant correlation pairs comprising of 144 bacteria-bacteria  
243 (B-B), 32 fungi-fungi (F-F) and 68 bacteria-fungi (B-F) interactions were identified  
244 (Fig. 4a-b, Fig. S6,  $p < 0.05$ ). Among them, 100 (69.4%) B-B, 23 (71.9%) F-F and 21  
245 (30.9%) B-F correlations were positive, indicating predominant co-occurring  
246 intrakingdom interactions and co-exclusive interkingdom interactions in COPD (Fig.  
247 4a). Among the inverse relationships between bacterial and fungal OTUs, the  
248 correlations between bOTU2 *Prevotella melaninogenica* and fOTU15  
249 *Leucosporidium scottii*, and between bOTU22 *Veillonella dispar* and fOTU2 *Candida*

250 *palmioleophila* were most significant (Table S3-4). In comparison, the same analysis  
251 yielded a reduced interaction network for healthy controls with 86 significant  
252 correlations, the majority of which (78, 90.7%) were B-B interactions (Fig. 4a-b). To  
253 adjust for sample size, we reconstructed disease network using a balanced sample size  
254 with healthy subjects (n=29). Despite a relatively smaller network, the network  
255 topology generally resembled that using all subjects (Fig. 4a, Fig. S7a), indicating  
256 sample size was likely not confounding the different networks between the two  
257 groups.

258

#### 259 Bacterial-fungal interactions in frequent and non-frequent exacerbators

260 We further performed sub-analysis on the interaction network for the FE and NE  
261 groups. Despite comparable network size, there were notable differences between  
262 bacterial and fungal interactions between the two groups (Fig. 4d, Fig. S6c-d). For  
263 example, in the FE group, four fOTUs, fOTU141 *Candida palmioleophila*, fOTU2  
264 *Candida palmioleophila*, fOTU9 *Aspergillus* spp. and fOTU3 Sordariomycetes spp.  
265 showed strong mutual positive correlations in a subnetwork (module 1), which  
266 together exhibited co-exclusive relationships with most other fOTUs (Fig. 4c, Fig.  
267 S6b). This module was however absent in the network for NE group. On the other  
268 hand, another subnetwork, consisting of the mutual co-occurrence relationships  
269 between bOTU29 *Rothia mucilaginosa*, bOTU226 *Veillonella* spp., bOTU2  
270 *Prevotella melaninogenica*, bOTU15 *Prevotella* spp. and bOTU5 *Streptococcus* spp.  
271 (module 2), was specifically present in the network for NE group. Again, network

272 reconstruction using a balanced sample size (n=26) indicated that the different  
273 networks observed were not related to sample size (Fig. S7b). Network reconstruction  
274 using Spearman correlation mostly recapitulated the findings using SparCC (FDR  
275  $p < 0.2$ , Fig. S8), indicating the differences in interaction network were robust to the  
276 algorithm used.

277

## 278 Correlations of bacterial and fungal microbiome with inflammatory mediators in 279 COPD

280 To investigate interactions between bacterial and fungal microbiome and host  
281 response, we performed correlation analysis between bacterial, fungal OTUs and  
282 inflammatory mediators on a subset of 40 COPD patients with all data available.  
283 Fifty-nine correlations were found between blood or sputum mediators and bacterial  
284 or fungal OTUs (FDR  $p < 0.20$ , Fig. 5). Of them, blood IL-6 was negatively correlated  
285 with bOTU8 *Lactobacillales* spp. and bOTU12 *Porphyromonas* spp. that were the hub  
286 OTUs in healthy controls, while it was positively correlated with fOTU8  
287 *Cryptococcus* spp. that was present in the COPD network. Sputum IL-6 was  
288 negatively correlated with bOTU5 *Streptococcus* spp. and bOTU29 *Rothia*  
289 *mucilaginosa* that was part of the module 1, and positively correlated with fOTU5  
290 *Aspergillus* spp. Sputum IL-8 was positively correlated with fOTU3 Sordariomycetes  
291 spp., fOTU9 *Aspergillus* spp., fOTU15 *Leucosporidium scottii* and fOTU85  
292 *Aspergillus penicillioides*, the former two being part of module 2 featured in the  
293 network for FE group. We were not able to perform the sub-analysis for frequent and

294 non-frequent exacerbators separately due to the small number of patients in each  
295 subgroup with available mediator measurements.

296

## 297 **Discussion**

298 Here we reported the first simultaneous characterization of the airway bacterial and  
299 fungal microbiome in COPD. The airway mycobiome was predominated by the  
300 phylum Ascomycota over Basidiomycota, consistent with observations in the airways  
301 of bronchiectasis and cystic fibrosis(17, 18, 38) but opposite to one study in  
302 asthma(15). We observed significant increases of pathogenic fungal taxa including  
303 *Candida*, *Cryptococcus* and *Schizophyllum* in COPD patients. Members of  
304 *Schizophyllum* and *Aspergillus* participate in invasive infections and provoke host  
305 immune recognition(39). *Cryptococcus* is known to interact with airway epithelium  
306 and lead to enhanced allergic inflammation(40). Overall there were greater  
307 community shifts for fungi than bacteria in COPD patients versus controls, and in FE  
308 versus NE. Supervised learning analysis identified a set of bacterial and fungal OTUs  
309 that together showed the optimal discriminatory potential for COPD patients and the  
310 frequent exacerbator phenotype, although cross-validation of these features in  
311 independent cohorts is warranted.

312

313 Importantly, there was a significant negative correlation between bacterial and fungal  
314 alpha diversity, both of which altered in opposite directions between COPD and  
315 healthy subjects and between FE and NE. Accordingly, individual bacterial and fungal



316 OTUs showed disproportionately higher co-exclusive than co-occurrence  
317 relationships with each other. In particular, commensal bacterial taxa such as  
318 *Prevotella* and *Veillonella* exhibited inverse relationships with pathogenic fungal taxa  
319 such as *Candida palmiroleophila* and *Aspergillus* spp. These results support the notion  
320 that there was a delicate balance between bacterial and fungal communities in the  
321 airways. The disruption of such community balance, characterized by the loss of  
322 commensal bacterial taxa and enriched pathogenic fungal taxa, is implicated in COPD  
323 pathogenesis(41, 42).

324

325 We observed distinct patterns of bacterial-fungal interactions both between COPD  
326 patients and healthy controls and between FE and NE. In particular, there was an  
327 enhanced and more sophisticated microbial interaction in COPD compared to healthy  
328 controls, which reflected a more active crosstalk between members of microbiome in  
329 response to altered local airway environments in disease. In healthy state, the airway  
330 microbiome was dominated by commensal bOTUs that mostly exhibited  
331 co-occurrence interactions. In COPD, additional B-F and F-F interactions were  
332 involved. While a higher number of F-F interactions were positive, a larger proportion  
333 of B-F interactions were negative, a finding that coincides with one recent study on  
334 the gut fungal microbiome in colorectal cancer(43). Thus the co-occurrence  
335 intrakingdom and co-exclusive interkingdom interactions may be a signature for  
336 disease-associated human microbiome in general. This is also in align with the  
337 opposite trend of changes between bacterial and fungal diversity, and suggests that

338 disruption of normal bacterial communities may provide pathogenic fungi with a  
339 favorable condition for intra-fungi interaction in COPD. Furthermore, several  
340 pro-inflammatory mediators such as blood and sputum IL-6 and sputum IL-8 that are  
341 known to associate with lung microbiome(4), were negatively correlated with  
342 commensal bOTUs in the health-related network, and positively correlated with  
343 disease-associated pathogenic fOTUs. Thus the perturbation of ecological interactions  
344 in COPD was also associated with increased airway and systemic inflammations.

345

346 There were also important differences in bacterial-fungal interactions between FE and  
347 NE. The most remarkable difference was the disappearance of five mutually  
348 co-occurring commensal bOTUs (module 2) and emergence of four mutually  
349 co-occurring pathogenic fOTUs (module 1) in FE. Our results suggest that there was  
350 further airway dysbiosis in frequent exacerbators characterized by the displacement of  
351 commensal bacterial interactions by pathogenic fungal interactions, which was also  
352 associated with enhanced airway inflammation. The emergence of pathogenic fungi in  
353 particular *Candida palmiophila* and *Aspergillus* spp. could be a marker for the  
354 frequent exacerbators that drives the greater microbial perturbation and inflammation,  
355 and together lead to the accelerated disease progression and increased vulnerability to  
356 subsequent exacerbations.

357

358 There are several caveats to our study. First, the study design is single-centred and  
359 cross-sectional. Further bacterial and fungal microbiome surveys preferably in cohorts

360 with different demographic background is warranted to validate our findings. Second,  
361 targeted amplicon sequencing has insufficient resolution in species-level identification,  
362 in particular for the fungal population with a lack of well-characterized reference  
363 database(6). Despite the attempt to improve the fungal taxonomy assignment using  
364 phylotyping algorithm, the fungal taxa that can be assigned to genus or species level  
365 remain limited. Third, due to limited sputum available, inflammatory mediators were  
366 characterized only for a subset of patients and not for healthy subjects, which limits  
367 our ability to perform more detailed analysis on host-microbiome interactions  
368 between COPD and healthy subjects and within different patient subgroups.

369

### 370 **Interpretation**

371 In summary, we characterized the collective airway bacterial and fungal microbiome  
372 in COPD. We showed that the disruption of airway community balance, characterized  
373 by the enriched pathogenic fungal taxa over commensal bacterial taxa, is implicated in  
374 COPD and associated with airway inflammation. The airway mycobiome is an  
375 important cofactor mediating pathogenic infection and airway inflammation, and  
376 should be taken into account when assessing the role of airway microbiome in COPD.

377

### 378 **Acknowledgements**

379 Author contributions: HZ and ZW had full access to all of the data in the study and  
380 takes responsibility for the integrity of the data and the accuracy of the data analysis.  
381 HL, RC and ZW conceived and designed the study. NC, XT, ZHL, ZYL and JS

382 coordinated the collection of sputum samples and clinical data. HL, FW, YY and CL  
383 processed the sputum samples, performed DNA extraction and library preparation.  
384 HL, YH and ZW performed all data analysis. RC and HZ supervised the study. ZW  
385 wrote the manuscript. All authors provided critical comments and approved the final  
386 version of the manuscript.

387

388 Financial disclosures: The authors declare that they have no competing interests.

389

390 Funding: This work was supported by the National Key R&D Program of China  
391 (2017YFC1310600), the National Natural Science Foundation of China  
392 (NSFC31970112), and the National Projects of Major Infectious Disease Control and  
393 Prevention (2017ZX10103011). Funders had no role in study design, collection,  
394 analysis and interpretation of data and in writing the manuscript.

395

396

## 397 **References**

- 398 1. **Shaw JG, Vaughan A, Dent AG, O'Hare PE, Goh F, Bowman RV, Fong KM, Yang IA.** 2014.  
399 Biomarkers of progression of chronic obstructive pulmonary disease (COPD). *Journal of thoracic*  
400 *disease* **6**:1532-1547.
- 401 2. **Patel IS, Seemungal TA, Wilks M, Lloyd-Owen SJ, Donaldson GC, Wedzicha JA.** 2002. Relationship  
402 between bacterial colonisation and the frequency, character, and severity of COPD exacerbations.  
403 *Thorax* **57**:759-764.
- 404 3. **Wilkinson TM, Patel IS, Wilks M, Donaldson GC, Wedzicha JA.** 2003. Airway bacterial load and  
405 FEV1 decline in patients with chronic obstructive pulmonary disease. *American journal of*  
406 *respiratory and critical care medicine* **167**:1090-1095.
- 407 4. **Wang Z, Bafadhel M, Haldar K, Spivak A, Mayhew D, Miller BE, Tal-Singer R, Johnston SL,**  
408 **Ramsheh MY, Barer MR, Brightling CE, Brown JR.** 2016. Lung microbiome dynamics in COPD  
409 exacerbations. *Eur Respir J* **47**:1082-1092.
- 410 5. **Einarsson GG, Comer DM, McIlreavey L, Parkhill J, Ennis M, Tunney MM, Elborn JS.** 2016.  
411 Community dynamics and the lower airway microbiota in stable chronic obstructive pulmonary  
412 disease, smokers and healthy non-smokers. *Thorax* **71**:795-803.
- 413 6. **Underhill DM, Iliev ID.** 2014. The mycobiota: interactions between commensal fungi and the host  
414 immune system. *Nature reviews. Immunology* **14**:405-416.
- 415 7. **Nguyen LD, Viscogliosi E, Delhaes L.** 2015. The lung mycobiome: an emerging field of the human  
416 respiratory microbiome. *Front Microbiol* **6**:89.
- 417 8. **Huang YJ, Sethi S, Murphy T, Nariya S, Boushey HA, Lynch SV.** 2014. Airway microbiome dynamics  
418 in exacerbations of chronic obstructive pulmonary disease. *J Clin Microbiol* **52**:2813-2823.
- 419 9. **Pragman AA, Lyu T, Baller JA, Gould TJ, Kelly RF, Reilly CS, Isaacson RE, Wendt CH.** 2018. The lung  
420 tissue microbiota of mild and moderate chronic obstructive pulmonary disease. *Microbiome* **6**:7.
- 421 10. **Sze MA, Dimitriu PA, Hayashi S, Elliott WM, McDonough JE, Gosselink JV, Cooper J, Sin DD, Mohn**  
422 **WW, Hogg JC.** 2012. The lung tissue microbiome in chronic obstructive pulmonary disease. *Am J*  
423 *Respir Crit Care Med* **185**:1073-1080.
- 424 11. **Sze MA, Dimitriu PA, Suzuki M, McDonough JE, Campbell JD, Brothers JF, Erb-Downward JR,**  
425 **Huffnagle GB, Hayashi S, Elliott WM, Cooper J, Sin DD, Lenburg ME, Spira A, Mohn WW, Hogg JC.**  
426 2015. Host Response to the Lung Microbiome in Chronic Obstructive Pulmonary Disease. *Am J*  
427 *Respir Crit Care Med* **192**:438-445.
- 428 12. **Leitao Filho FS, Alotaibi NM, Ngan D, Tam S, Yang J, Hollander Z, Chen V, FitzGerald JM, Nislow C,**  
429 **Leung JM, Man SFP, Sin DD.** 2018. Sputum Microbiome is Associated with 1-Year Mortality  
430 Following COPD Hospitalizations. *Am J Respir Crit Care Med*.
- 431 13. **Sinha R, Weissenburger-Moser LA, Clarke JL, Smith LM, Heires AJ, Romberger DJ, LeVan TD.** 2018.  
432 Short term dynamics of the sputum microbiome among COPD patients. *PLoS One* **13**:e0191499.
- 433 14. **Wang Z, Singh R, Miller BE, Tal-Singer R, Van Horn S, Tomsho L, Mackay A, Allinson JP, Webb AJ,**  
434 **Brookes AJ, George LM, Barker B, Kolsum U, Donnelly LE, Belchamber K, Barnes PJ, Singh D,**  
435 **Brightling CE, Donaldson GC, Wedzicha JA, Brown JR, Copdmap.** 2018. Sputum microbiome  
436 temporal variability and dysbiosis in chronic obstructive pulmonary disease exacerbations: an  
437 analysis of the COPDmap study. *Thorax* **73**:331-338.
- 438 15. **van Woerden HC, Gregory C, Brown R, Marchesi JR, Hoogendoorn B, Matthews IP.** 2013.  
439 Differences in fungi present in induced sputum samples from asthma patients and non-atopic

- 440 controls: a community based case control study. *BMC Infect Dis* **13**:69.
- 441 16. **Mac Aogain M, Chandrasekaran R, Lim AYH, Low TB, Tan GL, Hassan T, Ong TH, Hui Qi Ng A,**  
442 **Bertrand D, Koh JY, Pang SL, Lee ZY, Gwee XW, Martinus C, Sio YY, Matta SA, Chew FT, Keir HR,**  
443 **Connolly JE, Abisheganaden JA, Koh MS, Nagarajan N, Chalmers JD, Chotirmall SH.** 2018.  
444 Immunological corollary of the pulmonary mycobiome in bronchiectasis: the CAMEB study. *Eur*  
445 *Respir J* **52**.
- 446 17. **Kramer R, Sauer-Heilborn A, Welte T, Guzman CA, Abraham WR, Hofle MG.** 2015. Cohort Study of  
447 Airway Mycobiome in Adult Cystic Fibrosis Patients: Differences in Community Structure between  
448 Fungi and Bacteria Reveal Predominance of Transient Fungal Elements. *J Clin Microbiol*  
449 **53**:2900-2907.
- 450 18. **Delhaes L, Monchy S, Frealle E, Hubans C, Salleron J, Leroy S, Prevotat A, Wallet F, Wallaert B,**  
451 **Dei-Cas E, Sime-Ngando T, Chabe M, Viscogliosi E.** 2012. The airway microbiota in cystic fibrosis: a  
452 complex fungal and bacterial community--implications for therapeutic management. *PLoS One*  
453 **7**:e36313.
- 454 19. **Cui L, Lucht L, Tipton L, Rogers MB, Fitch A, Kessinger C, Camp D, Kingsley L, Leo N, Greenblatt**  
455 **RM, Fong S, Stone S, Dermand JC, Kleerup EC, Huang L, Morris A, Ghedin E.** 2015. Topographic  
456 diversity of the respiratory tract mycobiome and alteration in HIV and lung disease. *Am J Respir*  
457 *Crit Care Med* **191**:932-942.
- 458 20. **Charlson ES, Diamond JM, Bittinger K, Fitzgerald AS, Yadav A, Haas AR, Bushman FD, Collman RG.**  
459 2012. Lung-enriched organisms and aberrant bacterial and fungal respiratory microbiota after lung  
460 transplant. *Am J Respir Crit Care Med* **186**:536-545.
- 461 21. **Dickson RP, Martinez FJ, Huffnagle GB.** 2014. The role of the microbiome in exacerbations of  
462 chronic lung diseases. *Lancet* **384**:691-702.
- 463 22. **Wedzicha JA, Brill SE, Allinson JP, Donaldson GC.** 2013. Mechanisms and impact of the frequent  
464 exacerbator phenotype in chronic obstructive pulmonary disease. *BMC Med* **11**:181.
- 465 23. Global initiative for chronic obstructive lung disease (GOLD). Pocket Guide to COPD Diagnosis,  
466 Management and Prevention. A Guide for Health Care Professionals. 2019 Report.  
467 [www.goldcopd.com](http://www.goldcopd.com).
- 468 24. **Mayhew D, Devos N, Lambert C, Brown JR, Clarke SC, Kim VL, Magid-Slav M, Miller BE, Ostridge**  
469 **KK, Patel R, Sathe G, Simola DF, Staples KJ, Sung R, Tal-Singer R, Tuck AC, Van Horn S, Weynants V,**  
470 **Williams NP, Devaster JM, Wilkinson TMA, Group AS.** 2018. Longitudinal profiling of the lung  
471 microbiome in the AERIS study demonstrates repeatability of bacterial and eosinophilic COPD  
472 exacerbations. *Thorax* **73**:422-430.
- 473 25. **Caporaso JG, Kuczynski J, Stombaugh J, Bittinger K, Bushman FD, Costello EK, Fierer N, Pena AG,**  
474 **Goodrich JK, Gordon JI, Huttley GA, Kelley ST, Knights D, Koenig JE, Ley RE, Lozupone CA,**  
475 **McDonald D, Muegge BD, Pirrung M, Reeder J, Sevinsky JR, Turnbaugh PJ, Walters WA, Widmann**  
476 **J, Yatsunenko T, Zaneveld J, Knight R.** 2010. QIIME allows analysis of high-throughput community  
477 sequencing data. *Nature methods* **7**:335-336.
- 478 26. **Zhou HW, Li DF, Tam NF, Jiang XT, Zhang H, Sheng HF, Qin J, Liu X, Zou F.** 2011. BIPES, a  
479 cost-effective high-throughput method for assessing microbial diversity. *ISME J* **5**:741-749.
- 480 27. **Edgar RC, Haas BJ, Clemente JC, Quince C, Knight R.** 2011. UCHIME improves sensitivity and speed  
481 of chimera detection. *Bioinformatics* **27**:2194-2200.
- 482 28. **Taylor SL, Leong LEX, Choo JM, Wesselingh S, Yang IA, Upham JW, Reynolds PN, Hodge S, James**  
483 **AL, Jenkins C, Peters MJ, Baraket M, Marks GB, Gibson PG, Simpson JL, Rogers GB.** 2018.

- 484 Inflammatory phenotypes in patients with severe asthma are associated with distinct airway  
485 microbiology. *J Allergy Clin Immunol* **141**:94-103 e115.
- 486 29. **Edgar RC**. 2010. Search and clustering orders of magnitude faster than BLAST. *Bioinformatics*  
487 **26**:2460-2461.
- 488 30. **Al-Hebshi NN, Nasher AT, Idris AM, Chen T**. 2015. Robust species taxonomy assignment algorithm  
489 for 16S rRNA NGS reads: application to oral carcinoma samples. *J Oral Microbiol* **7**:28934.
- 490 31. **Mitra S, Stark M, Huson DH**. 2011. Analysis of 16S rRNA environmental sequences using MEGAN.  
491 *BMC Genomics* **12 Suppl 3**:S17.
- 492 32. **Segata N, Izard J, Waldron L, Gevers D, Miropolsky L, Garrett WS, Huttenhower C**. 2011.  
493 Metagenomic biomarker discovery and explanation. *Genome Biol* **12**:R60.
- 494 33. **Frank E, Hall M, Witten I**. 2016. The WEKA Workbench. Online Appendix for "Data Mining:  
495 Practical Machine Learning Tools and Techniques". Morgan Kaufmann, Fourth Edition.
- 496 34. **Friedman J, Alm EJ**. 2012. Inferring correlation networks from genomic survey data. *PLoS Comput*  
497 *Biol* **8**:e1002687.
- 498 35. **Faust K, Raes J**. 2016. CoNet app: inference of biological association networks using Cytoscape.  
499 *F1000Research* **5**:1519.
- 500 36. **Benjamini Y, and Hochberg, Y**. 1995. Controlling the false discovery rate – a practical and powerful  
501 approach to multiple testing. *J R Stat Soc Ser B Methodol* **57**:289-300.
- 502 37. **Molyneaux PL, Willis-Owen SAG, Cox MJ, James P, Cowman S, Loebinger M, Blanchard A,**  
503 **Edwards LM, Stock C, Daccord C, Renzoni EA, Wells AU, Moffatt MF, Cookson WOC, Maher TM.**  
504 2017. Host-Microbial Interactions in Idiopathic Pulmonary Fibrosis. *Am J Respir Crit Care Med*  
505 **195**:1640-1650.
- 506 38. **Mac Aogain M, Chandrasekaran R, Lim AYH, Low TB, Tan GL, Hassan T, Ong TH, Ng AHQ, Bertrand**  
507 **D, Koh JY, Pang SL, Lee ZY, Gwee XW, Martinus C, Sio YY, Matta SA, Chew FT, Keir HR, Connolly JE,**  
508 **Abisheganaden JA, Koh MS, Nagarajan N, Chalmers JD, Chotirmall SH**. 2018. Immunological  
509 corollary of the pulmonary mycobiome in bronchiectasis: the CAMEB study. *Eur Respir J* **52**.
- 510 39. **Ishii KJ, Koyama S, Nakagawa A, Coban C, Akira S**. 2008. Host innate immune receptors and  
511 beyond: making sense of microbial infections. *Cell host & microbe* **3**:352-363.
- 512 40. **Goldman DL, Davis J, Bommarito F, Shao X, Casadevall A**. 2006. Enhanced allergic inflammation  
513 and airway responsiveness in rats with chronic *Cryptococcus neoformans* infection: potential role  
514 for fungal pulmonary infection in the pathogenesis of asthma. *J Infect Dis* **193**:1178-1186.
- 515 41. **Iliev ID, Leonardi I**. 2017. Fungal dysbiosis: immunity and interactions at mucosal barriers. *Nature*  
516 *reviews. Immunology* **17**:635-646.
- 517 42. **Marsland BJ, Gollwitzer ES**. 2014. Host-microorganism interactions in lung diseases. *Nature*  
518 *reviews. Immunology* **14**:827-835.
- 519 43. **Coker OO, Nakatsu G, Dai RZ, Wu WKK, Wong SH, Ng SC, Chan FKL, Sung JJY, Yu J**. 2018. Enteric  
520 fungal microbiota dysbiosis and ecological alterations in colorectal cancer. *Gut*.

521

522

523 **Figure Legends**

524 **Figure 1. Heatmaps showing the major bacteria and fungi genera (>1% average**  
525 **abundance) in COPD patients and healthy controls.** Each column represents an  
526 individual grouped first by healthy or COPD subjects and then clustered by bacterial  
527 or fungal microbiota composition. The rows on the top represent demographic factors.

528

529 **Figure 2. Airway bacterial and fungal composition between COPD patients and**  
530 **healthy controls.** Shannon index for (a) bacterial and (b) fungal microbiome in  
531 COPD patients and healthy controls. Beta diversity was assessed based on unweighted  
532 UniFrac distances and plotted in PCoA. (c) The AUC curves for the random forest  
533 models in separating COPD and healthy groups using the LEfSe-selected bacterial,  
534 fungal and their combined OTUs.

535

536 **Figure 3. Airway bacterial and fungal composition between COPD frequent and**  
537 **non-frequent exacerbators.** Shannon index for (a) bacterial and (b) fungal  
538 microbiome in COPD frequent (FE) and non-frequent exacerbators (NE). Beta  
539 diversity was assessed based on unweighted UniFrac distances and plotted in PCoA.  
540 (c) The AUC curves for the random forest models in separating FE and NE using the  
541 LEfSe-selected bacterial, fungal and their combined OTUs.

542

543 **Figure 4. Airway bacterial and fungal interaction networks.** (a) The number of  
544 significant bacterial-bacterial (B-B), bacterial-fungal (B-F) and fungal-fungal (F-F)



545 interactions in the networks of healthy controls, COPD patients, the subgroup of  
546 COPD patients with healthy-matched sample size (COPD-match), non-frequent  
547 exacerbators (NE), frequent exacerbators (FE) and the subgroup of NE with  
548 FE-matched sample size ( $p < 0.05$ ). **(b)** Venn diagram for the shared and unique B-B,  
549 B-F and F-F interactions between COPD patients and healthy controls, and between  
550 FE and NE. **(c-d)** Bacterial and fungal interaction networks for healthy controls and  
551 COPD patients (c), and for NE and FE (d). Nodes were shaped by bacterial or fungal  
552 OTUs, and colored by their fold changes in COPD versus healthy groups or in FE  
553 versus NE groups. The size of the node is proportional to its degree of connectivity.  
554 Edges were colored by co-occurrence (blue) and co-exclusive (red) interactions. Edge  
555 width is proportional to the absolute correlation score. Only significant interactions  
556 with SparCC correlation  $> 0.3$  were shown for visualization purpose. Module 1 is  
557 highlighted in red dotted ellipse. Module 2 is highlighted in blue ellipse. The full  
558 interaction networks are in Fig. S6.

559

560 **Figure 5. Interaction network between airway bacterial and fungal microbiome**  
561 **and host inflammatory mediators.** Nodes were shaped by bacterial or fungal OTUs  
562 or inflammatory mediators. Bacterial and fungal OTUs were colored by their fold  
563 changes in COPD patients versus healthy controls. The size of the node is  
564 proportional to its degree of connectivity. Edges were colored by co-occurrence (blue)  
565 and co-exclusive (red) interactions. Edge width is proportional to the absolute  
566 correlation score in Spearman correlation (FDR  $p < 0.20$ ). Only correlations between

567 bacterial/fungal OTUs and host inflammatory mediators were shown for visualization  
 568 purpose.

569 **TABLE 1. Major clinical characteristics of subjects.**

|                               | Healthy<br>(n=29) | COPD<br>(n=84)     | Historical exacerbation |                    |
|-------------------------------|-------------------|--------------------|-------------------------|--------------------|
|                               |                   |                    | frequency               |                    |
|                               |                   |                    | NE group<br>(n=52)      | FE group<br>(n=27) |
| Age, mean (SD)                | 44.28<br>(23.10)  | 64.55<br>(8.83)*** | 66.02 (7.72)            | 61.50 (9.76)       |
| Gender,<br>n(male/female)     | 21/8              | 81/3***            | 50/2                    | 25/1               |
| Smoking, n(yes/no)            | 9/20              | 74/7***            | 45/7                    | 23/0               |
| FEV1% predicted,<br>mean (SD) | NA                | 51.11 (23.46)      | 55.63 (23.54)           | 41.71 (19.91)*     |
| ICS+LABA, n(yes/no)           | NA                | 51/33              | 34/18                   | 17/9               |

570 FEV1: forced expiratory volume in 1s. ICS+LABA: Combination of inhaled  
 571 corticosteroid and long-acting bronchodilators. \*\*\*p<0.001, \*\*p<0.01, \*p<0.05

572

### Healthy

### COPD

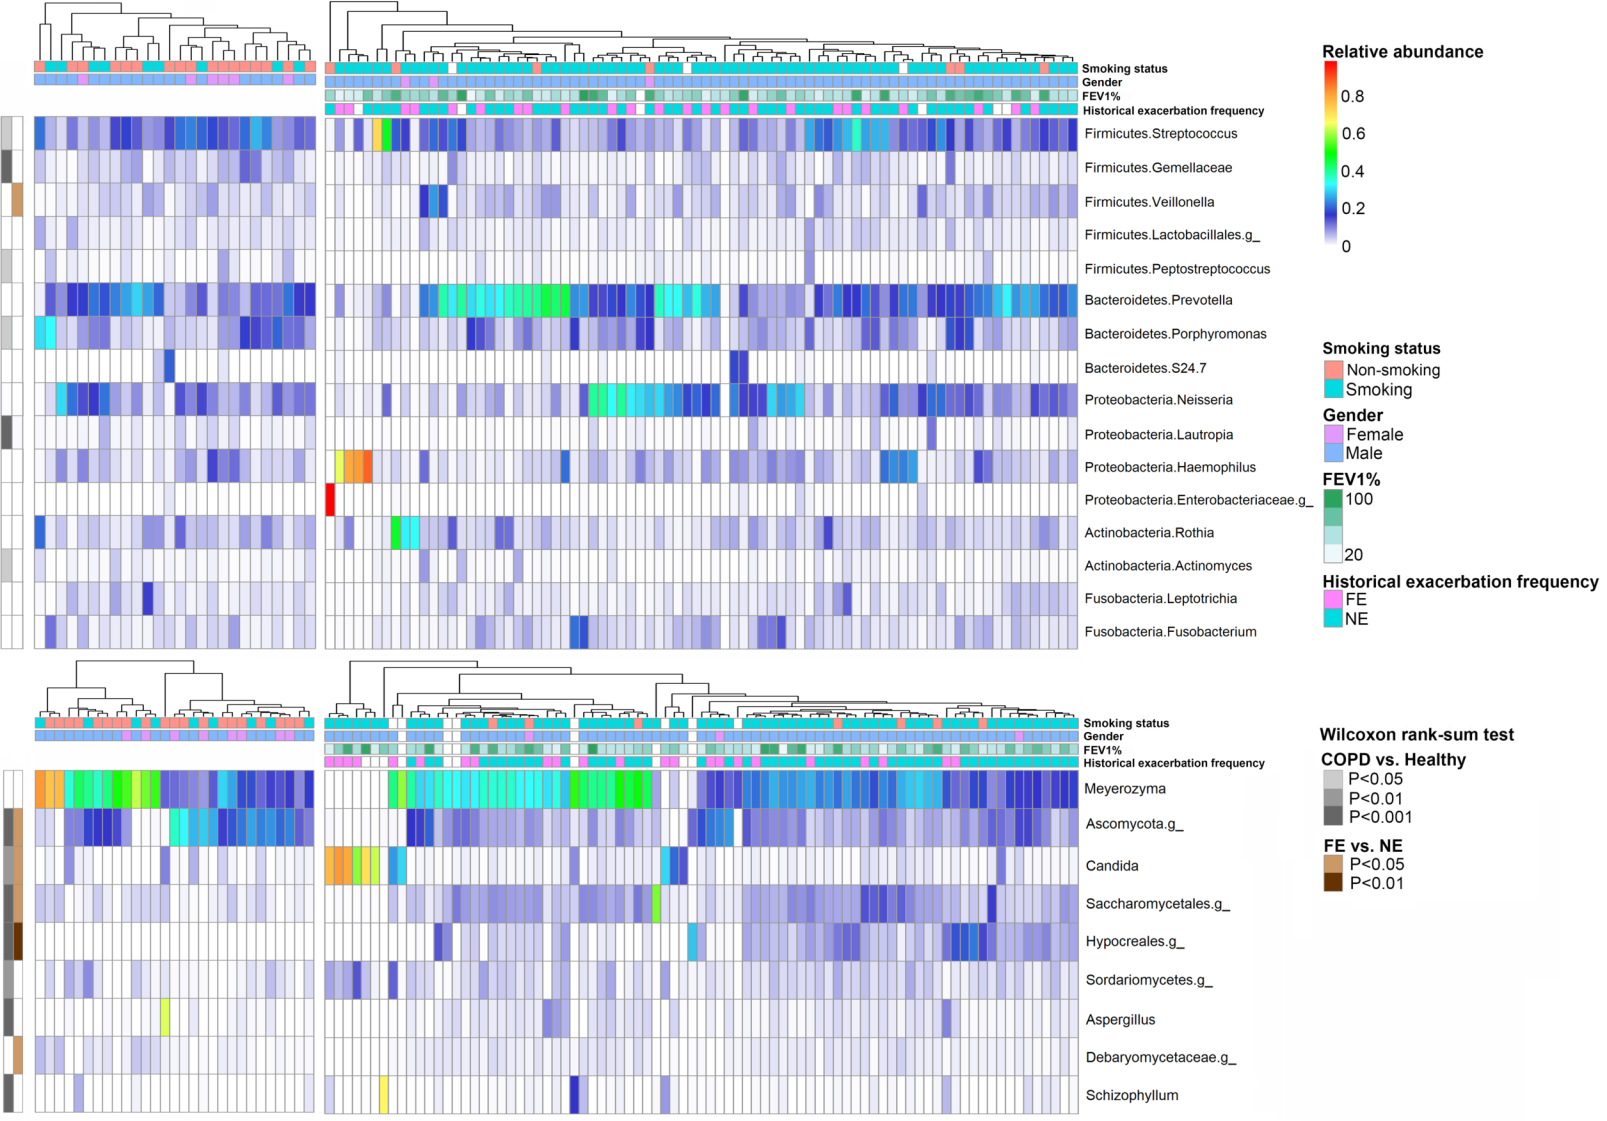

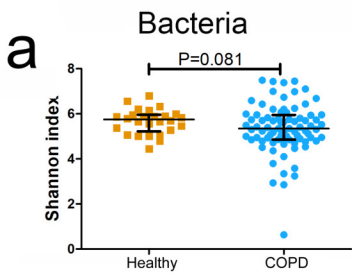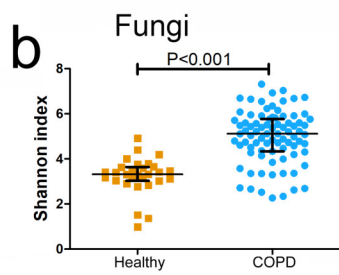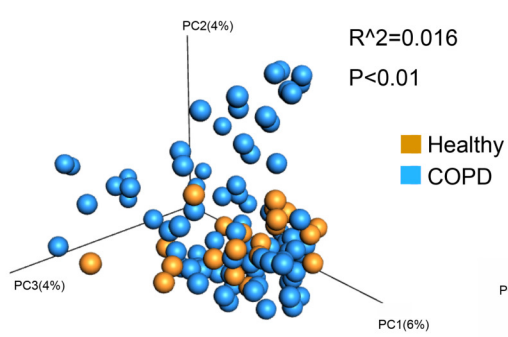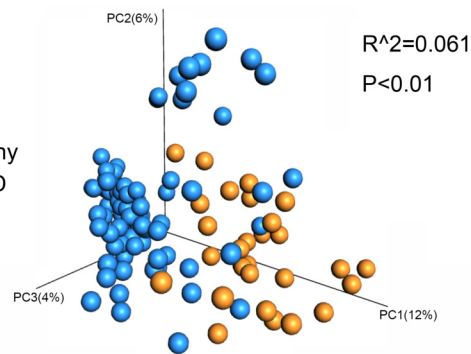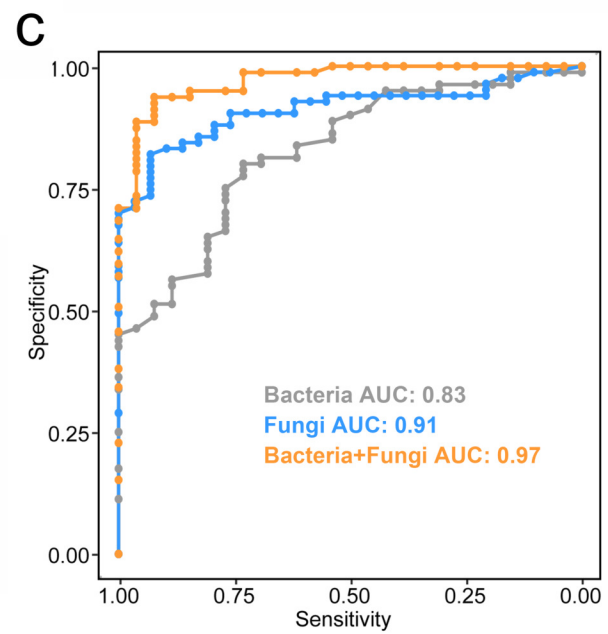

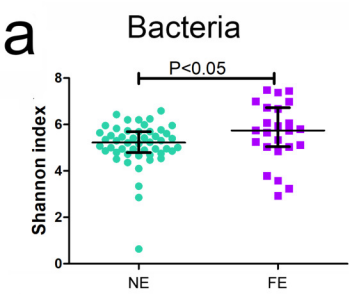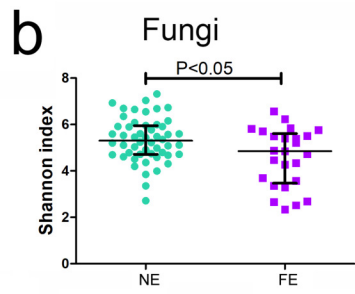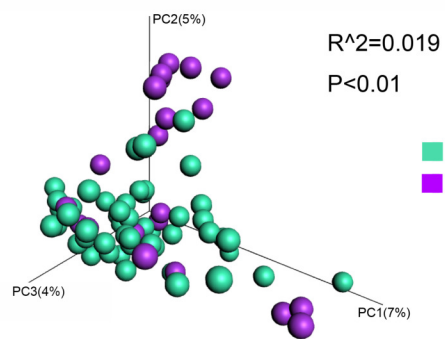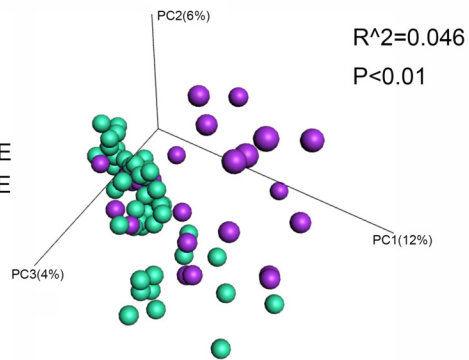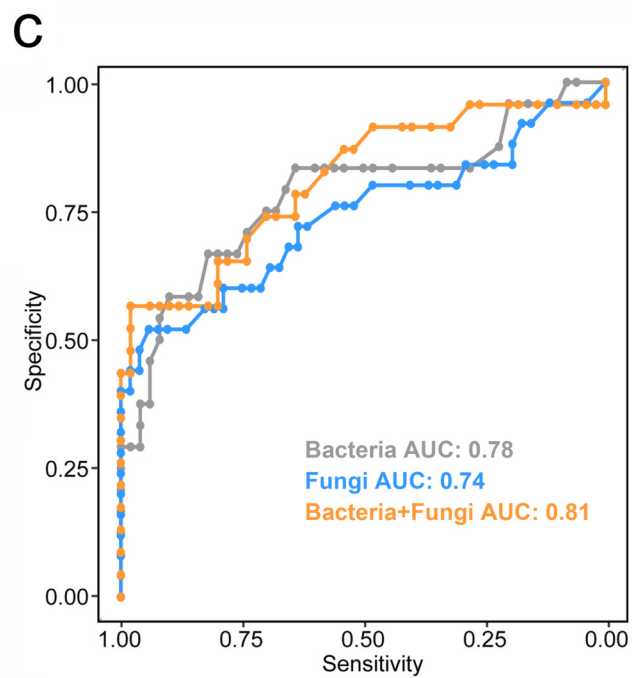

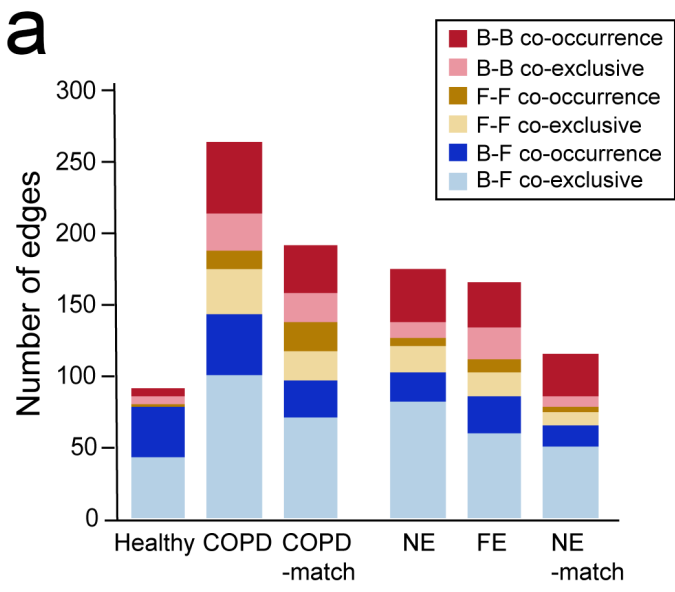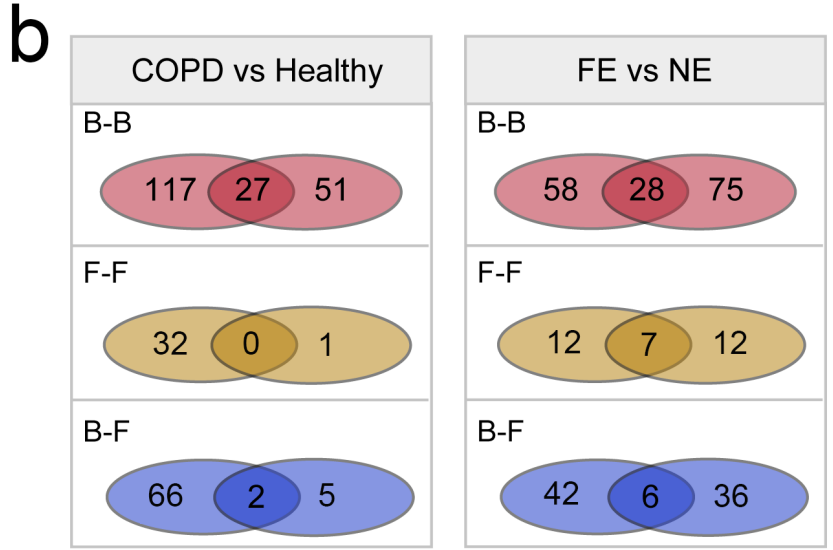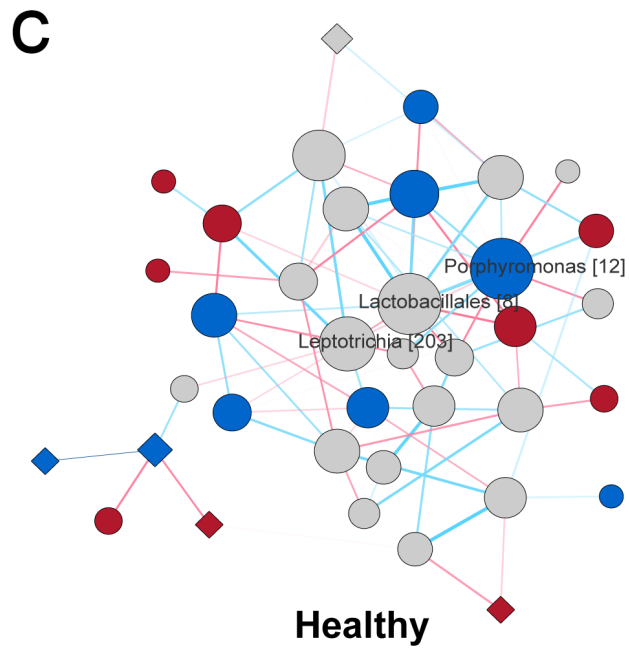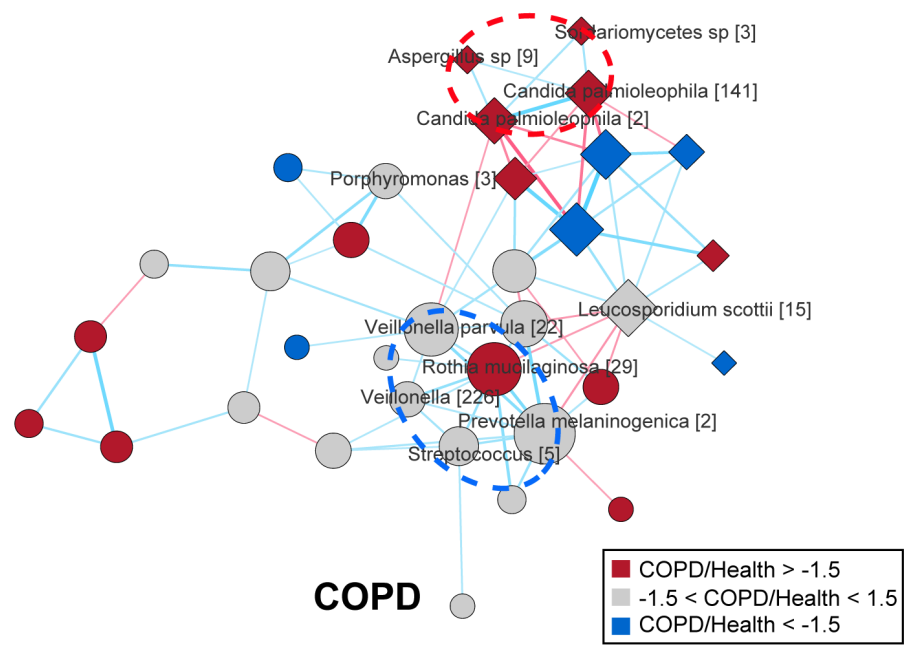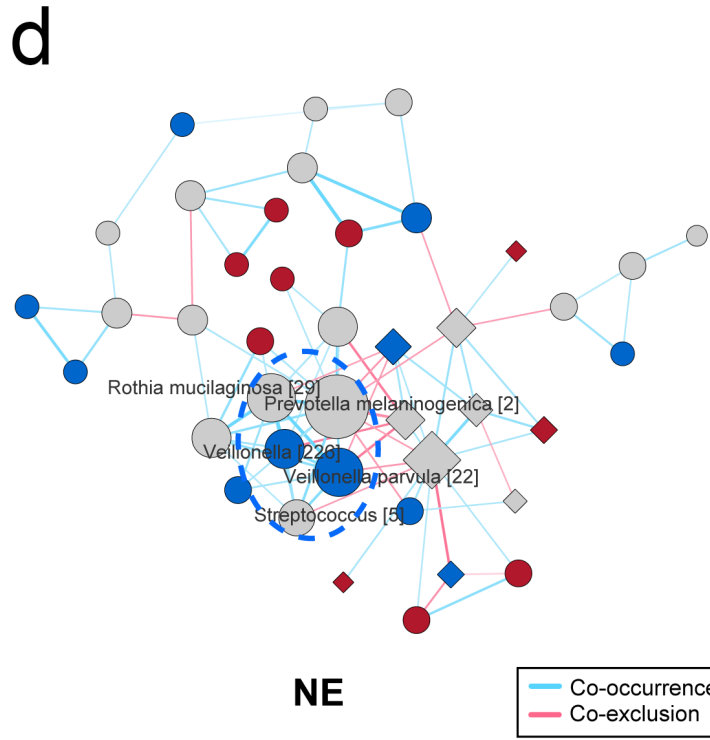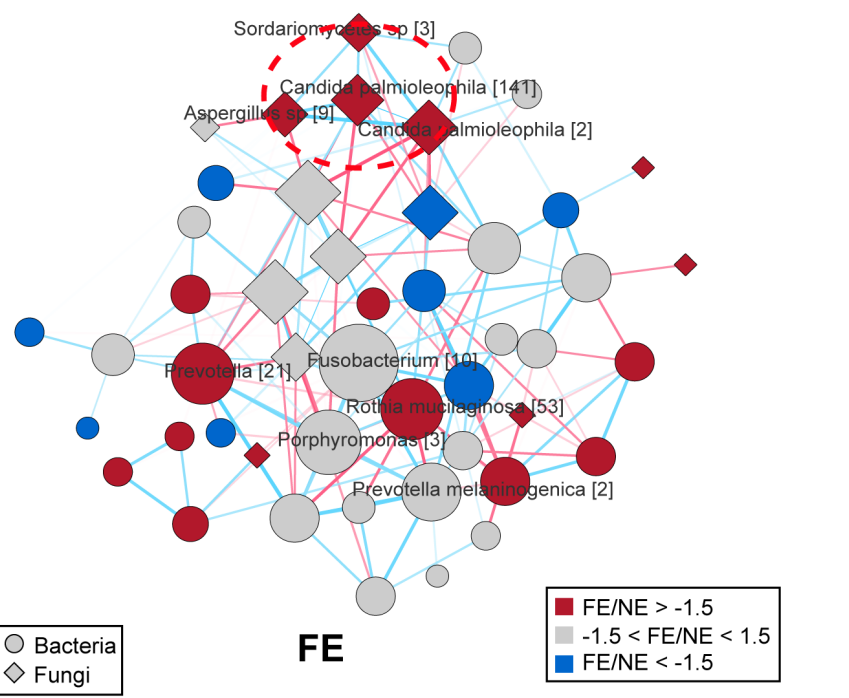

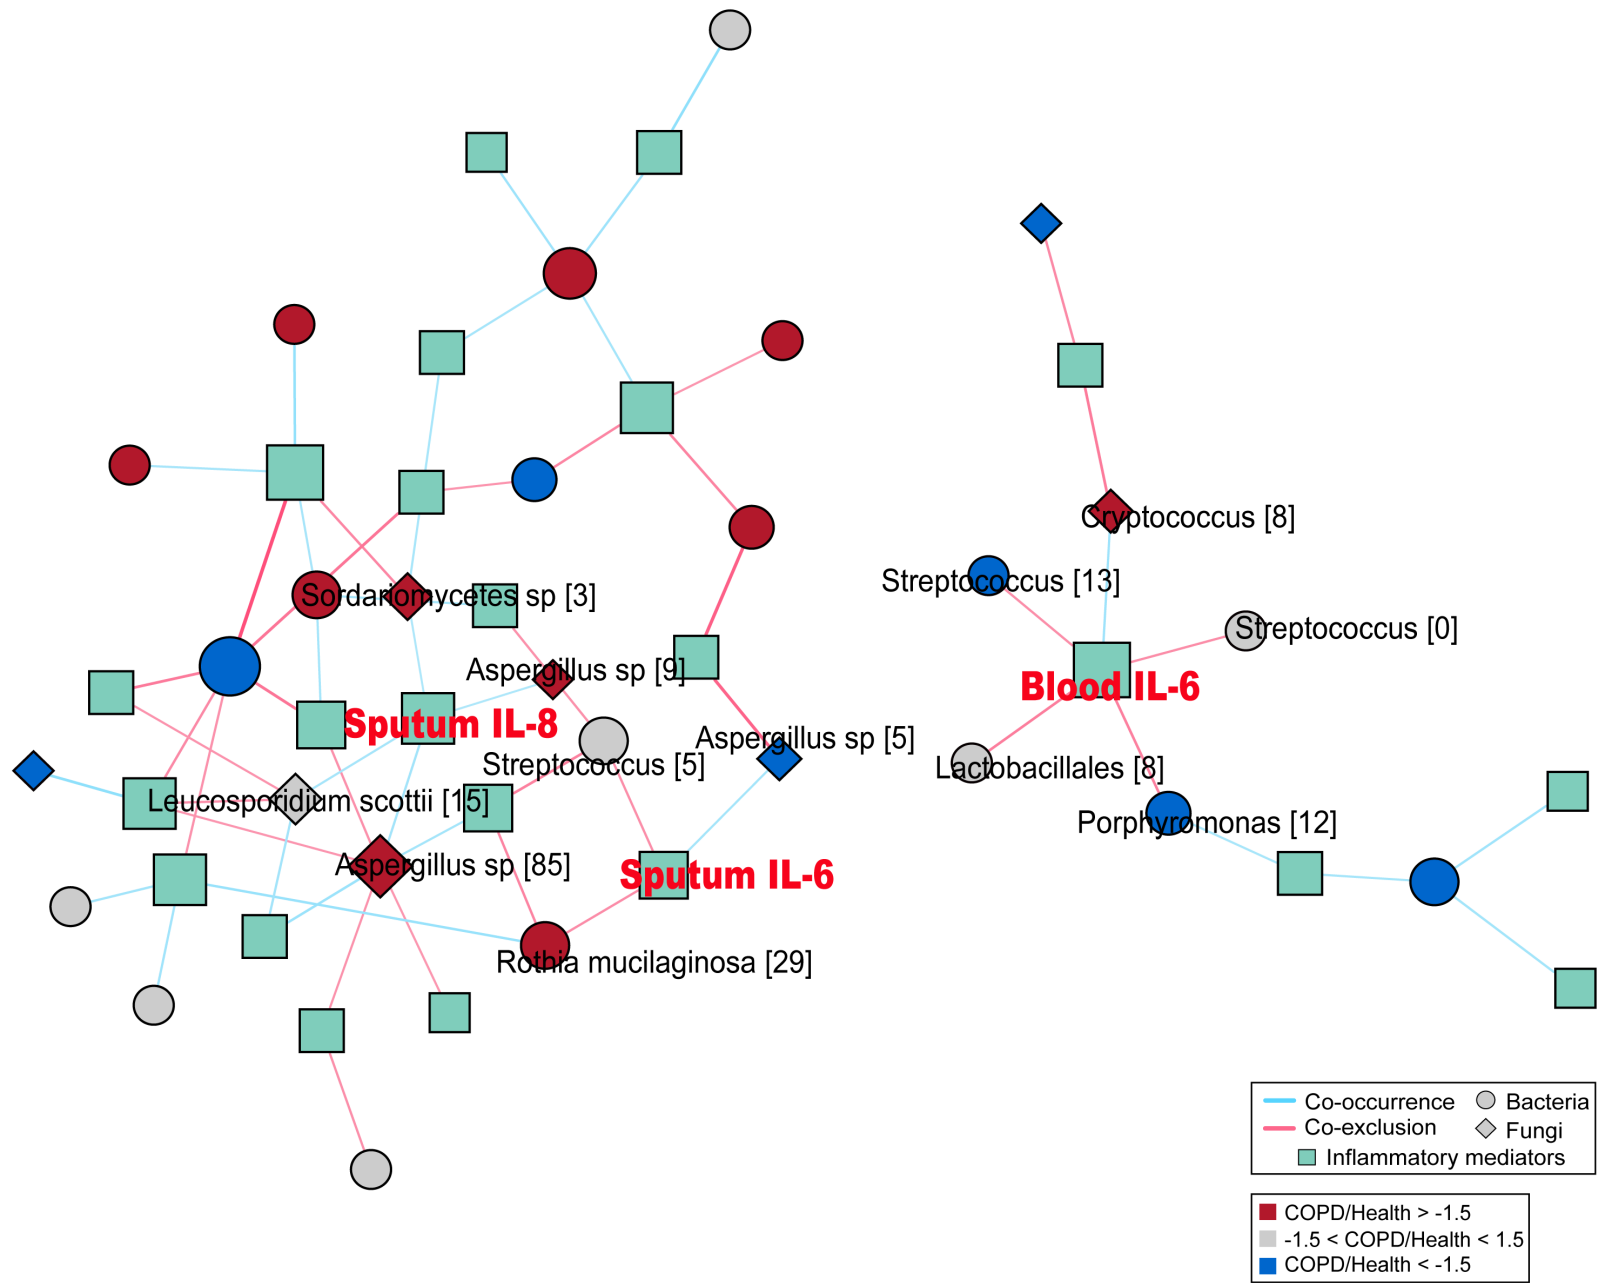

Source: https://www.biorxiv.org/content/10.1101/2020.10.05.327536v1.full.pdf
